# Supplementary material for: A Multilevel Analysis of Neighbourhood Built and Social Environments and Adult Self-Reported Physical Activity and Body Mass Index in Ottawa, Canada
Source: Int J Environ Res Public Health. 2011 Oct 14;8(10):3953–78. doi: 10.3390/ijerph8103953 (PMC3210591; doi:10.3390/ijerph8103953)
Supplement: Supplementary file 1 [file ijerph-08-03953-s001.pdf]

**Supplementary table.** Bivariate correlations between neighbourhood variables.

|                                     | Indoor facilities | Summer Facilities | Winter facilities | Park area      | Green space    | Bike/path length | Grocery stores  | Convenience stores | Specialty stores | Restaurants     | Fast food       | SES index       | Sense of belonging | Voting rates    | Crime rates     |
|-------------------------------------|-------------------|-------------------|-------------------|----------------|----------------|------------------|-----------------|--------------------|------------------|-----------------|-----------------|-----------------|--------------------|-----------------|-----------------|
| Indoor facilities                   | 1.00              | 0.11<br><.0001    | -0.02<br>0.17     | 0.13<br><.0001 | 0.004<br>0.83  | -0.21<br><.0001  | 0.11<br><.0001  | 0.33<br><.0001     | 0.21<br><.0001   | 0.22<br><.0001  | 0.15<br><.0001  | 0.11<br><.0001  | 0.07<br>.0001      | 0.09<br><.0001  | 0.10<br><.0001  |
| Summer facilities                   |                   | 1.00              | 0.58<br><.0001    | 0.49<br><.0001 | 0.10<br><.0001 | -0.06<br>.0006   | -0.17<br><.0001 | -0.27<br><.0001    | -0.27<br><.0001  | -0.26<br><.0001 | -0.23<br><.0001 | -0.37<br><.0001 | 0.14<br><.0001     | 0.23<br><.0001  | -0.49<br><.0001 |
| Winter facilities                   |                   |                   | 1.00              | 0.29<br><.0001 | -0.03<br>0.15  | -0.10<br><.0001  | -0.15<br><.0001 | -0.17<br><.0001    | -0.19<br><.0001  | -0.15<br><.0001 | -0.11<br><.0001 | -0.21<br><.0001 | 0.10<br><.0001     | 0.21<br><.0001  | -0.35<br><.0001 |
| Park area (km <sup>2</sup> )        |                   |                   |                   | 1.00           | 0.06<br>0.001  | 0.01<br>0.44     | -0.17<br><.0001 | -0.19<br><.0001    | -0.18<br><.0001  | -0.14<br><.0001 | -0.15<br><.0001 | -0.29<br><.0001 | 0.10<br><.0001     | 0.20<br><.0001  | -0.28<br><.0001 |
| Green space area (km <sup>2</sup> ) |                   |                   |                   |                | 1.00           | 0.64<br><.0001   | -0.07<br><.0001 | -0.04<br>0.03      | -0.07<br><.0001  | -0.05<br>0.003  | -0.03<br>0.08   | -0.08<br><.0001 | -0.02<br>0.16      | 0.03<br>0.11    | -0.07<br><.0001 |
| Bike/path length (km)               |                   |                   |                   |                |                | 1.00             | -0.02<br>0.24   | -0.24<br><.0001    | -0.16<br><.0001  | -0.08<br><.0001 | -0.02<br>0.16   | -0.32<br><.0001 | 0.05<br>.002       | 0.16<br><.0001  | -0.003<br>0.86  |
| Grocery stores                      |                   |                   |                   |                |                |                  | 1.00            | 0.43<br><.0001     | 0.25<br><.0001   | 0.05<br>0.002   | 0.20<br><.0001  | 0.42<br><.0001  | -0.09<br><.0001    | -0.24<br><.0001 | 0.29<br><.0001  |
| Convenience stores                  |                   |                   |                   |                |                |                  |                 | 1.00               | 0.49<br><.0001   | 0.41<br><.0001  | 0.38<br><.0001  | 0.66<br><.0001  | -0.35<br><.0001    | -0.40<br><.0001 | 0.46<br><.0001  |
| Specialty stores                    |                   |                   |                   |                |                |                  |                 |                    | 1.00             | 0.88<br><.0001  | 0.85<br><.0001  | 0.30<br><.0001  | 0.02<br>0.34       | -0.12<br><.0001 | 0.56<br><.0001  |
| Restaurants                         |                   |                   |                   |                |                |                  |                 |                    |                  | 1.00            | 0.93<br><.0001  | 0.13<br><.0001  | 0.04<br>0.03       | -0.08<br><.0001 | 0.57<br><.0001  |
| Fast food                           |                   |                   |                   |                |                |                  |                 |                    |                  |                 | 1.00            | 0.15<br><.0001  | 0.04<br>0.02       | -0.10<br><.0001 | 0.54<br><.0001  |
| SES index                           |                   |                   |                   |                |                |                  |                 |                    |                  |                 |                 | 1.00            | -0.37<br><.0001    | -0.50<br><.0001 | 0.32<br><.0001  |
| Sense of belonging                  |                   |                   |                   |                |                |                  |                 |                    |                  |                 |                 |                 | 1.00               | 0.22<br><.0001  | -0.16<br><.0001 |
| Voting rates                        |                   |                   |                   |                |                |                  |                 |                    |                  |                 |                 |                 |                    | 1.00            | -0.27<br><.0001 |
| Crime rates                         |                   |                   |                   |                |                |                  |                 |                    |                  |                 |                 |                 |                    |                 | 1.00            |

Pearson correlation (p-value)
